# Supplementary material for: Radiomics analysis for predicting pembrolizumab response in patients with advanced rare cancers
Source: HighWire-hosted journal article supplement (doi:10.1136/jitc-2020-001752), 2021-04-01
Supplement: jitc-2020-001752supp001_data_supplement.pdf [file jitc-2020-001752supp001_data_supplement.pdf]

Supplemental Table S1. Radiomics Model Performances Generated by Different Classifier

| Prediction of RECIST response using top 10 LASSO features on 57 patients   |          |             |             |
|----------------------------------------------------------------------------|----------|-------------|-------------|
| Classifier Type                                                            | Accuracy | Sensitivity | Specificity |
| Support Vector Machine                                                     | 71.93%   | 75.68%      | 65.00%      |
| Decision Tree                                                              | 75.44%   | 78.38%      | 70.00%      |
| Random Forest                                                              | 77.19%   | 81.08%      | 70.00%      |
| XGBoost                                                                    | 94.74%   | 97.30%      | 90.00%      |
|                                                                            |          |             |             |
| Prediction of irRECIST response using top 10 LASSO features on 57 patients |          |             |             |
| Classifier Type                                                            | Accuracy | Sensitivity | Specificity |
| Support Vector Machine                                                     | 73.68%   | 75.76%      | 70.83%      |
| Decision Tree                                                              | 70.18%   | 72.73%      | 66.67%      |
| Random Forest                                                              | 77.19%   | 81.82%      | 70.83%      |
| XGBoost                                                                    | 94.74%   | 93.94%      | 95.83%      |

Supplemental Table S2. Results of Normality Test Looking for Distribution of Variables

| Top 10 LASSO features from RECIST model |         | Top 10 LASSO features from irRECIST model |         | Demographic Variable |                 |
|-----------------------------------------|---------|-------------------------------------------|---------|----------------------|-----------------|
| Feature                                 | P-value | Feature                                   | P-value | Age                  | P-value=0.00215 |
| P_F7                                    | 0.57112 | P_F89                                     | 0.88205 |                      |                 |
| P_F84                                   | 0.23476 | P_F187                                    | 0.13816 |                      |                 |
| P_F269                                  | 0.23184 | P_F269                                    | 0.57944 |                      |                 |
| P_F289                                  | 0.3061  | P_F289                                    | 0.35358 |                      |                 |
| PV_F35                                  | 0.38787 | PV_F24                                    | 0.53648 |                      |                 |
| PV_F89                                  | 0.91328 | PV_F81                                    | 0.10991 |                      |                 |
| PV_F109                                 | 0.13542 | PV_F270                                   | 0.21483 |                      |                 |
| Ar_F152                                 | 0.05004 | Ar_F152                                   | 0.43135 |                      |                 |
| Ar_F154                                 | 0.63007 | ArV_F36                                   | 0.28886 |                      |                 |
| Ar_F238                                 | 0.38352 | ArV_F247                                  | 0.37607 |                      |                 |

Supplemental Table S3A. Multivariate Analysis on the 10 Features (Taken from Patients Assessed by RECIST) with Clinical Variables

| Demographic Variable                                           | MANOVA test results |         |          |        |        |         |
|----------------------------------------------------------------|---------------------|---------|----------|--------|--------|---------|
|                                                                | Df                  | Pillai  | approx F | num Df | den Df | Pr(>F)  |
| No. of Prior Therapies [> 2 or <= 2]<br>Residuals              | 1                   | 0.14697 | 0.79251  | 10     | 46     | 0.636   |
|                                                                | 55                  |         |          |        |        |         |
|                                                                |                     |         |          |        |        |         |
| Race<br>Residuals                                              | 4                   | 0.49823 | 0.65448  | 40     | 184    | 0.9433  |
|                                                                | 52                  |         |          |        |        |         |
|                                                                |                     |         |          |        |        |         |
| Gender<br>Residuals                                            | 1                   | 0.28036 | 1.7921   | 10     | 46     | 0.08905 |
|                                                                | 55                  |         |          |        |        |         |
| Signif. codes: 0 '****' 0.001 '**' 0.01 '*' 0.05 '.' 0.1 ' ' 1 |                     |         |          |        |        |         |

Supplemental Table S3B: Multivariate Analysis on the 10 Features (Taken from Patients Assessed by irRECIST) with Clinical Variables

| Demographic Variable                                           | MANOVA test results |         |          |        |        |         |
|----------------------------------------------------------------|---------------------|---------|----------|--------|--------|---------|
|                                                                | Df                  | Pillai  | approx F | num Df | den Df | Pr(>F)  |
| No. of Prior Therapies [> 2 or <= 2]<br>Residuals              | 1                   | 0.24446 | 1.4883   | 10     | 46     | 0.1745  |
|                                                                | 55                  |         |          |        |        |         |
|                                                                |                     |         |          |        |        |         |
| Race<br>Residuals                                              | 4                   | 0.31563 | 0.39407  | 40     | 184    | 0.9996  |
|                                                                | 52                  |         |          |        |        |         |
|                                                                |                     |         |          |        |        |         |
| Gender<br>Residuals                                            | 1                   | 0.31292 | 2.095    | 10     | 46     | 0.0444* |
|                                                                | 55                  |         |          |        |        |         |
| Signif. codes: 0 '****' 0.001 '**' 0.01 '*' 0.05 '.' 0.1 ' ' 1 |                     |         |          |        |        |         |

Df stands for the degrees of freedom.  
Pillai stands for the value of the test statistic in this test.  
approx F stands for an approximated F statistic to this test.  
num Df stands for the numerator degrees of freedom of the F-ratio corresponding to this test.  
den Df stands for the denominator degrees of freedom of the F-ratio corresponding to this test.  
Pr(>F) stands for the p-value of this test.

**Supplemental Table S4A: Univariate Analysis on the 10 Features (Taken from Patients Assessed by RECIST) with Clinical Covariates**

| Feature | One-way ANOVA test          |                            |                                                 | Pearson Correlation Coefficient [r] |
|---------|-----------------------------|----------------------------|-------------------------------------------------|-------------------------------------|
|         | Gender                      | Race                       | Number of Prior Therapies [ $> 2$ or $\leq 2$ ] | Age at Initial Diagnosis, in years  |
| P_F7    | F(1,55) = 0.069, p = 0.793  | F(4,52) = 0.980, p = 0.426 | F(1,55) = 0.253, p = 0.617                      | 0.103                               |
| P_F84   | F(1,55) = 4.309, p = 0.043* | F(4,52) = 0.330, p = 0.856 | F(1,55) = 0.854, p = 0.359                      | -0.146                              |
| P_F269  | F(1,55) = 0.591, p = 0.445  | F(4,52) = 0.045, p = 0.995 | F(1,55) = 0.722, p = 0.399                      | -0.002                              |
| P_F289  | F(1,55) = 0.767, p = 0.385  | F(4,52) = 0.280, p = 0.889 | F(1,55) = 0.442, p = 0.508                      | 0.012                               |
| PV_F35  | F(1,55) = 0.229, p = 0.634  | F(4,52) = 0.559, p = 0.693 | F(1,55) = 0.035, p = 0.853                      | -0.084                              |
| PV_F89  | F(1,55) = 0.555, p = 0.459  | F(4,52) = 1.593, p = 0.190 | F(1,55) = 0.030, p = 0.862                      | 0.032                               |
| PV_F109 | F(1,55) = 0.031, p = 0.862  | F(4,52) = 0.963, p = 0.436 | F(1,55) = 0.029, p = 0.865                      | 0.012                               |
| Ar_F152 | F(1,55) = 6.243, p = 0.015* | F(4,52) = 0.217, p = 0.928 | F(1,55) = 0.049, p = 0.826                      | -0.039                              |
| Ar_F154 | F(1,55) = 0.000, p = 0.988  | F(4,52) = 0.993, p = 0.419 | F(1,55) = 0.154, p = 0.696                      | 0.240                               |
| Ar_F238 | F(1,55) = 0.038, p = 0.846  | F(4,52) = 0.341, p = 0.849 | F(1,55) = 1.814, p = 0.183                      | 0.048                               |

**Supplemental Table S4B: Univariate Analysis on the 10 Features (Taken from Patients Assessed by irRECIST) with Clinical Covariates**

| Feature | One-way ANOVA test          |                            |                                              | Pearson Correlation Coefficient [r] |
|---------|-----------------------------|----------------------------|----------------------------------------------|-------------------------------------|
|         | Gender                      | Race                       | No. of Prior Therapies [ $> 2$ or $\leq 2$ ] | Age at Initial Diagnosis, in years  |
| P_F7    | F(1,55) = 0.069, p = 0.793  | F(4,52) = 0.980, p = 0.426 | F(1,55) = 0.253, p = 0.617                   | 0.103                               |
| P_F84   | F(1,55) = 4.309, p = 0.043* | F(4,52) = 0.330, p = 0.856 | F(1,55) = 0.854, p = 0.359                   | -0.146                              |
| P_F269  | F(1,55) = 0.591, p = 0.445  | F(4,52) = 0.045, p = 0.995 | F(1,55) = 0.722, p = 0.399                   | -0.002                              |
| P_F289  | F(1,55) = 0.767, p = 0.385  | F(4,52) = 0.280, p = 0.889 | F(1,55) = 0.442, p = 0.508                   | 0.012                               |
| PV_F35  | F(1,55) = 0.229, p = 0.634  | F(4,52) = 0.559, p = 0.693 | F(1,55) = 0.035, p = 0.853                   | -0.084                              |
| PV_F89  | F(1,55) = 0.555, p = 0.459  | F(4,52) = 1.593, p = 0.190 | F(1,55) = 0.030, p = 0.862                   | 0.032                               |
| PV_F109 | F(1,55) = 0.031, p = 0.862  | F(4,52) = 0.963, p = 0.436 | F(1,55) = 0.029, p = 0.865                   | 0.012                               |
| Ar_F152 | F(1,55) = 6.243, p = 0.015* | F(4,52) = 0.217, p = 0.928 | F(1,55) = 0.049, p = 0.826                   | -0.039                              |
| Ar_F154 | F(1,55) = 0.000, p = 0.988  | F(4,52) = 0.993, p = 0.419 | F(1,55) = 0.154, p = 0.696                   | 0.240                               |
| Ar_F238 | F(1,55) = 0.038, p = 0.846  | F(4,52) = 0.341, p = 0.849 | F(1,55) = 1.814, p = 0.183                   | 0.048                               |

**Supplemental Table S5: Univariate Association for Independent Association Between Radiomics Features and Treatment Response**

| Top 10 LASSO features from RECIST model |                                             | Top 10 LASSO features from irRECIST model |                                              |
|-----------------------------------------|---------------------------------------------|-------------------------------------------|----------------------------------------------|
| Radiomics Feature                       | Welch Two Sample t-test                     | Radiomics Feature                         | Welch Two Sample t-test                      |
| P_F7                                    | t = 0.75051, df = 31.4, p-value = 0.4585    | P_F89                                     | t = 2.7162, df = 44.815, p-value = 0.009348* |
| P_F84                                   | t = 0.28333, df = 37.84, p-value = 0.7785   | P_F187                                    | t = 1.9374, df = 35.734, p-value = 0.06064   |
| P_F269                                  | t = 2.2598, df = 46.958, p-value = 0.02851* | P_F269                                    | t = 2.1697, df = 49.883, p-value = 0.03482*  |
| P_F289                                  | t = 2.2383, df = 41.312, p-value = 0.03065* | P_F289                                    | t = 2.3428, df = 46.87, p-value = 0.02344*   |
| PV_F35                                  | t = 2.4684, df = 19.589, p-value = 0.02292* | PV_F24                                    | t = 1.8515, df = 29.119, p-value = 0.07426   |
| PV_F89                                  | t = 2.3159, df = 21.968, p-value = 0.03028* | PV_F81                                    | t = 2.1749, df = 38.588, p-value = 0.03583*  |
| PV_F109                                 | t = 2.8168, df = 19.894, p-value = 0.01069* | PV_F270                                   | t = -0.96974, df = 50.109, p-value = 0.3368  |
| Ar_F152                                 | t = -0.77189, df = 33.756, p-value = 0.4456 | Ar_F152                                   | t = -0.51419, df = 48.364, p-value = 0.6095  |
| Ar_F154                                 | t = 0.67226, df = 31.596, p-value = 0.5063  | ArV_F36                                   | t = 0.32664, df = 39.354, p-value = 0.7457   |
| Ar_F238                                 | t = -1.1571, df = 32.633, p-value = 0.2556  | ArV_F247                                  | t = 1.4169, df = 39.817, p-value = 0.1643    |

**Supplemental Table S6: A univariate cox regression model looking for association of OS with each of the top 10 texture features from RECIST model.**

| Texture Feature | Beta  | Wald test | p-value        |
|-----------------|-------|-----------|----------------|
| P_F7            | -0.65 | 0.57      | 0.45           |
| P_F84           | 0.25  | 0.05      | 0.82           |
| P_F269          | 2.7   | 7.6       | <b>0.0058*</b> |
| P_F289          | 2.2   | 5.9       | <b>0.015*</b>  |
| PV_F35          | 3.9   | 7.4       | <b>0.0063*</b> |
| PV_F89          | 5.4   | 5.6       | <b>0.018*</b>  |
| PV_F109         | 3.5   | 6         | <b>0.014*</b>  |
| Ar_F152         | 0.082 | 0.01      | 0.94           |
| Ar_F154         | 1.2   | 2.5       | 0.11           |
| Ar_F238         | -2.5  | 4.1       | <b>0.044*</b>  |



**Supplemental Table S 7: A multivariate cox regression using significant texture features from univariate cox models of RECIST with overall survival.**

| N= 57, Number of events= 44                                   |         |            |          |           |           |        |                 |
|---------------------------------------------------------------|---------|------------|----------|-----------|-----------|--------|-----------------|
|                                                               | coef    | exp(-coef) | se(coef) | lower .95 | upper .95 | z      | Pr(> z )        |
| <b>P_F269</b>                                                 | 0.6866  | 0.5033     | 3.4334   | 0.002375  | 1662.318  | 0.2    | 0.8415          |
| <b>P_F289</b>                                                 | 1.7488  | 0.173975   | 3.2569   | 0.009711  | 3402.262  | 0.537  | 0.5913          |
| <b>PV_F35</b>                                                 | 5.0281  | 0.006551   | 2.5573   | 1.016074  | 22931.01  | 1.966  | <b>0.0493 *</b> |
| <b>PV_F89</b>                                                 | -0.6446 | 1.905239   | 4.37     | 0.0001    | 2753.112  | -0.148 | 0.8827          |
| <b>PV_F109</b>                                                | -2.0183 | 7.52534    | 2.9064   | 0.000446  | 39.574    | -0.694 | 0.4874          |
| <b>Ar_F238</b>                                                | -1.7083 | 5.519334   | 1.4691   | 0.010177  | 3.226     | -1.163 | 0.2449          |
| Concordance = 0.668 (se = 0.055)                              |         |            |          |           |           |        |                 |
| Likelihood ratio test = 22.27 on 6 df, p=0.001                |         |            |          |           |           |        |                 |
| Wald test = 13.84 on 6 df, p=0.03                             |         |            |          |           |           |        |                 |
| Score (log-rank) test = 15.61 on 6 df, p=0.02                 |         |            |          |           |           |        |                 |
| Signif. codes: 0 '***' 0.001 '**' 0.01 '*' 0.05 '.' 0.1 ' ' 1 |         |            |          |           |           |        |                 |

**Supplemental Table S8: The results of log-rank test performed on each of the 10 radiomic texture feature from RECIST model with overall survival.**

| Texture Feature | N  | Observed | Expected | (O-E)^2/E | (O-E)^2/V | Chisq | df | p-value        |
|-----------------|----|----------|----------|-----------|-----------|-------|----|----------------|
| <b>P_F7</b>     |    |          |          |           |           |       |    |                |
| High            | 21 | 15       | 16.8     | 0.184     | 0.299     | 0.3   | 1  | 0.58           |
| Low             | 36 | 29       | 27.2     | 0.113     | 0.299     |       |    |                |
| <b>P_F84</b>    |    |          |          |           |           |       |    |                |
| High            | 37 | 29       | 27.1     | 0.134     | 0.356     | 0.4   | 1  | 0.55           |
| Low             | 20 | 15       | 16.9     | 0.215     | 0.356     |       |    |                |
| <b>P_F269</b>   |    |          |          |           |           |       |    |                |
| High            | 37 | 30       | 24.2     | 1.41      | 3.28      | 3.3   | 1  | 0.07           |
| Low             | 20 | 14       | 19.8     | 1.72      | 3.28      |       |    |                |
| <b>P_F289</b>   |    |          |          |           |           |       |    |                |
| High            | 21 | 18       | 9.56     | 7.46      | 10.2      | 10.2  | 1  | <b>0.0014*</b> |
| Low             | 36 | 26       | 34.44    | 2.07      | 10.2      |       |    |                |
| <b>PV_F35</b>   |    |          |          |           |           |       |    |                |
| High            | 37 | 31       | 21.8     | 3.88      | 8.08      | 8.1   | 1  | <b>0.0045*</b> |
| Low             | 20 | 13       | 22.2     | 3.81      | 8.08      |       |    |                |
| <b>PV_F89</b>   |    |          |          |           |           |       |    |                |
| High            | 37 | 31       | 23.3     | 2.56      | 5.76      | 5.8   | 1  | <b>0.016*</b>  |
| Low             | 20 | 13       | 20.7     | 2.88      | 5.76      |       |    |                |
| <b>PV_F109</b>  |    |          |          |           |           |       |    |                |
| High            | 37 | 30       | 26.7     | 0.412     | 1.06      | 1.1   | 1  | 0.3            |
| Low             | 20 | 14       | 17.3     | 0.635     | 1.06      |       |    |                |
| <b>Ar_F152</b>  |    |          |          |           |           |       |    |                |
| High            | 16 | 11       | 16.8     | 2.01      | 3.43      | 3.4   | 1  | 0.064          |
| Low             | 41 | 33       | 27.2     | 1.24      | 3.43      |       |    |                |
| <b>Ar_F154</b>  |    |          |          |           |           |       |    |                |
| High            | 41 | 33       | 29.4     | 0.447     | 1.38      | 1.4   | 1  | 0.24           |
| Low             | 16 | 11       | 14.6     | 0.898     | 1.38      |       |    |                |
| <b>Ar_F238</b>  |    |          |          |           |           |       |    |                |
| High            | 16 | 10       | 18.2     | 3.68      | 6.51      | 6.5   | 1  | <b>0.011*</b>  |
| Low             | 41 | 34       | 25.8     | 2.59      | 6.51      |       |    |                |

**Supplemental Table S9: A univariate cox regression model looking for association of OS with each of the top 10 texture features from irRECIST model.**

| Texture Feature | Beta  | Wald test | p-value        |
|-----------------|-------|-----------|----------------|
| P_F89           | 0.9   | 1.2       | 0.27           |
| P_F187          | -0.27 | 0.11      | 0.74           |
| P_F269          | 2.7   | 7.6       | <b>0.0058*</b> |
| P_F289          | 2.2   | 5.9       | <b>0.015*</b>  |
| PV_F24          | 2.1   | 4.9       | <b>0.027*</b>  |
| PV_F81          | 6.1   | 9         | <b>0.0026*</b> |
| PV_F270         | -0.52 | 0.26      | 0.61           |
| Ar_F152         | 0.082 | 0.01      | 0.94           |
| ArV_F36         | 3.1   | 4         | <b>0.044*</b>  |
| ArV_F247        | 2.8   | 3.6       | 0.058          |

**Supplemental Table S10: A multivariate cox regression using significant texture features from univariate cox models of irRECIST with overall survival.**

| N= 57, Number of events= 44                                   |        |            |          |           |           |       |                   |
|---------------------------------------------------------------|--------|------------|----------|-----------|-----------|-------|-------------------|
|                                                               | coef   | exp(-coef) | se(coef) | lower .95 | upper .95 | z     | Pr(> z )          |
| <b>P_F269</b>                                                 | 0.9416 | 0.390005   | 3.5546   | 0.002417  | 2720.2    | 0.265 | 0.79109           |
| <b>P_F289</b>                                                 | 1.2886 | 0.275652   | 3.2142   | 0.006664  | 1975      | 0.401 | 0.68848           |
| <b>PV_F24</b>                                                 | 1.0991 | 0.333162   | 2.2067   | 0.039717  | 226.8     | 0.498 | 0.61843           |
| <b>PV_F81</b>                                                 | 5.8544 | 0.002867   | 2.1692   | 4.967427  | 24486.6   | 2.699 | <b>0.00696 **</b> |
| <b>ArV_F36</b>                                                | 3.1774 | 0.041696   | 1.4094   | 1.514479  | 379.8     | 2.254 | <b>0.02417 *</b>  |
| Concordance = 0.701 (se = 0.046)                              |        |            |          |           |           |       |                   |
| Likelihood ratio test = 26.2 on 5 df, p=8e-05                 |        |            |          |           |           |       |                   |
| Wald test = 17.18 on 5 df, p=0.004                            |        |            |          |           |           |       |                   |
| Score (log-rank) test = 21.54 on 5 df, p=6e-04                |        |            |          |           |           |       |                   |
| Signif. codes: 0 '***' 0.001 '**' 0.01 '*' 0.05 '.' 0.1 ' ' 1 |        |            |          |           |           |       |                   |

**Supplemental Table S11: The results of log-rank test performed on each of the 10 radiomic texture feature from irRECIST model with overall survival.**

| Texture Feature | N  | Observed | Expected | (O-E)^2/E | (O-E)^2/V | Chisq | df | p-value        |
|-----------------|----|----------|----------|-----------|-----------|-------|----|----------------|
| <b>P_F89</b>    |    |          |          |           |           |       |    |                |
| High            | 37 | 30       | 26.2     | 0.54      | 1.35      | 1.4   | 1  | 0.24           |
| Low             | 20 | 14       | 17.8     | 0.797     | 1.35      |       |    |                |
| <b>P_F187</b>   |    |          |          |           |           |       |    |                |
| High            | 37 | 30       | 30.5     | 0.00754   | 0.0248    | 0     | 1  | 0.87           |
| Low             | 20 | 14       | 13.5     | 0.01701   | 0.0248    |       |    |                |
| <b>P_F269</b>   |    |          |          |           |           |       |    |                |
| High            | 37 | 30       | 24.2     | 1.41      | 3.28      | 3.3   | 1  | 0.07           |
| Low             | 20 | 14       | 19.8     | 1.72      | 3.28      |       |    |                |
| <b>P_F289</b>   |    |          |          |           |           |       |    |                |
| High            | 21 | 18       | 9.56     | 7.46      | 10.2      | 10.2  | 1  | <b>0.0014*</b> |
| Low             | 36 | 26       | 34.44    | 2.07      | 10.2      |       |    |                |
| <b>PV_F24</b>   |    |          |          |           |           |       |    |                |
| High            | 37 | 31       | 26       | 0.945     | 2.35      | 2.3   | 1  | 0.13           |
| Low             | 20 | 13       | 18       | 1.37      | 2.35      |       |    |                |
| <b>PV_F81</b>   |    |          |          |           |           |       |    |                |
| High            | 37 | 31       | 22.3     | 3.4       | 7.24      | 7.2   | 1  | <b>0.0071*</b> |
| Low             | 20 | 13       | 21.7     | 3.49      | 7.24      |       |    |                |
| <b>PV_F270</b>  |    |          |          |           |           |       |    |                |
| High            | 37 | 28       | 33.4     | 0.869     | 3.92      | 3.9   | 1  | <b>0.048*</b>  |
| Low             | 20 | 16       | 10.6     | 2.734     | 3.92      |       |    |                |
| <b>Ar_F152</b>  |    |          |          |           |           |       |    |                |
| High            | 16 | 11       | 16.8     | 2.01      | 3.43      | 3.4   | 1  | 0.064          |
| Low             | 41 | 33       | 27.2     | 1.24      | 3.43      |       |    |                |
| <b>ArV_F36</b>  |    |          |          |           |           |       |    |                |
| High            | 41 | 33       | 30.7     | 0.168     | 0.569     | 0.6   | 1  | 0.45           |
| Low             | 16 | 11       | 13.3     | 0.39      | 0.569     |       |    |                |
| <b>ArV_F247</b> |    |          |          |           |           |       |    |                |
| High            | 41 | 34       | 29.6     | 0.658     | 2.07      | 2.1   | 1  | 0.15           |
| Low             | 16 | 10       | 14.4     | 1.35      | 2.07      |       |    |                |

**Supplemental Figure S1.**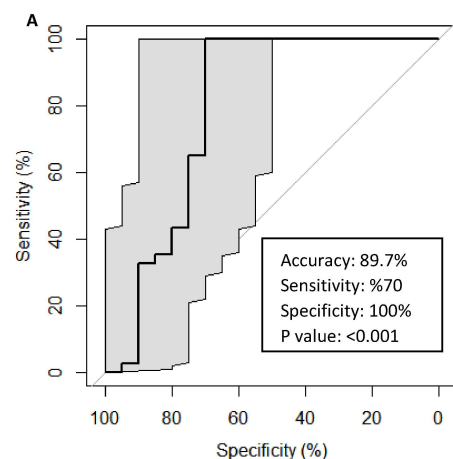

Supplemental Figure S1A. ROC curve representing the performance of the radiomic analysis when feature selection and LOOCV were performed simultaneously in patients assessed by RECIST

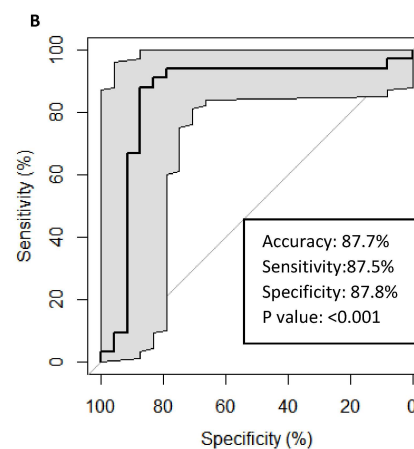

Supplemental Figure S1B. ROC curve representing the performance of the radiomic analysis when feature selection and LOOCV were performed simultaneously in patients assessed by irRECIST

**Supplemental Figure S2.**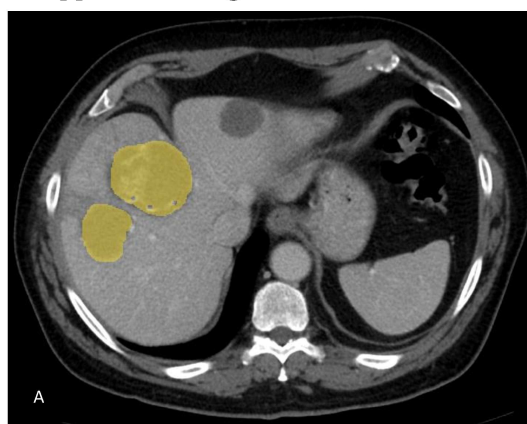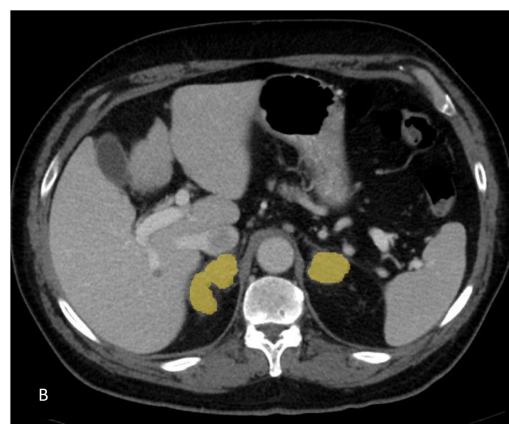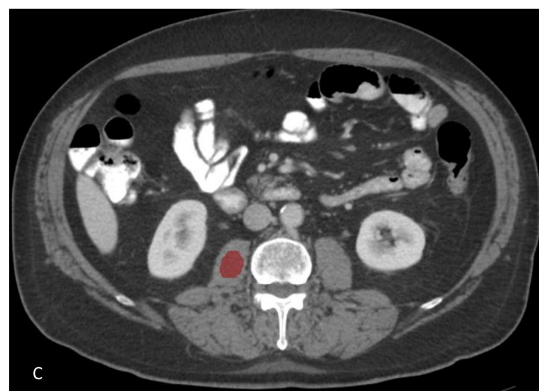

Supplemental Figure S2. CT scans for a 68-year-old man with epithelioid hemangioendothelioma that did not respond to pembrolizumab. Target lesions in the liver (A) and bilateral suprarenal glands (B) were segmented and labeled with yellow. (C) A volume of interest, labeled with red, on the paraspinal muscle was taken for normalization.

**Supplemental Figure S3.**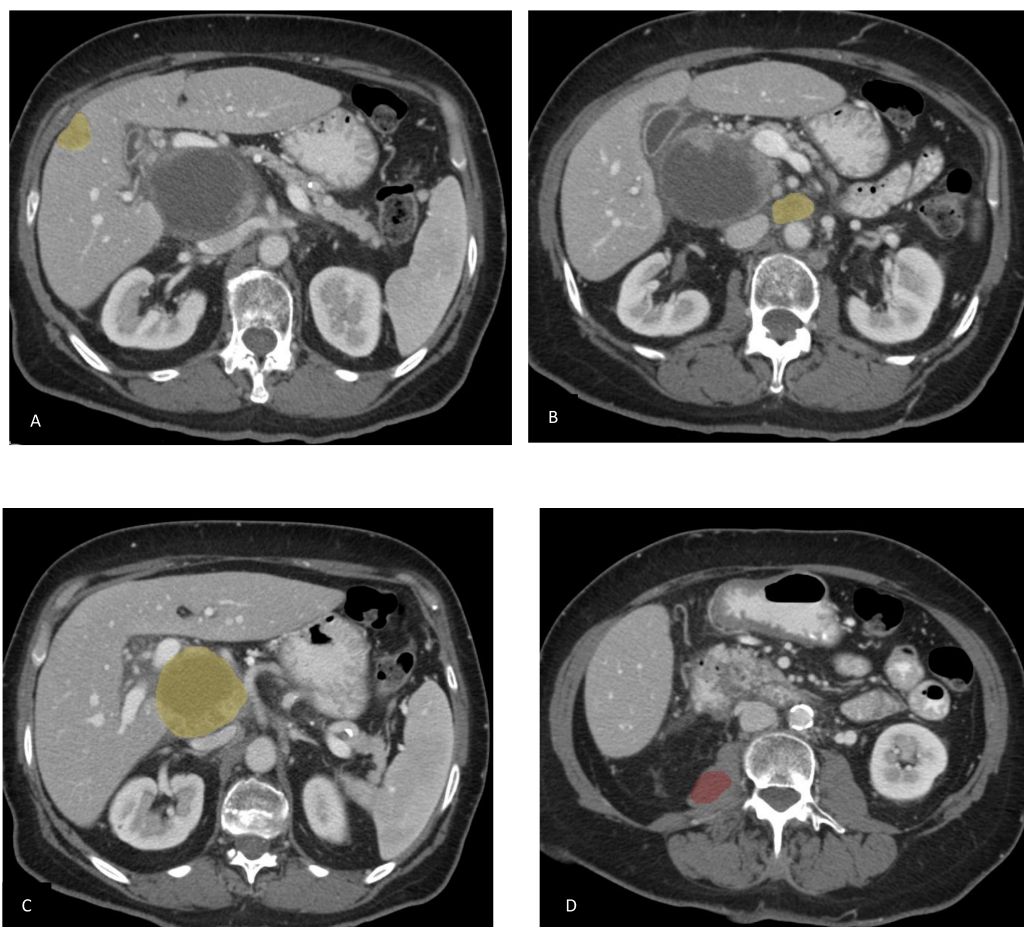

Supplemental Figure S3. CT scans for a 60-year-old woman with carcinoma of unknown primary that did not respond to pembrolizumab. Target lesions (shown in yellow) in the pancreas (A), liver (B), and lymph nodes (C) were segmented. (D) A volume of interest on the right paraspinal muscle (shown in red) was taken for normalization.

**Supplemental Figure S4.**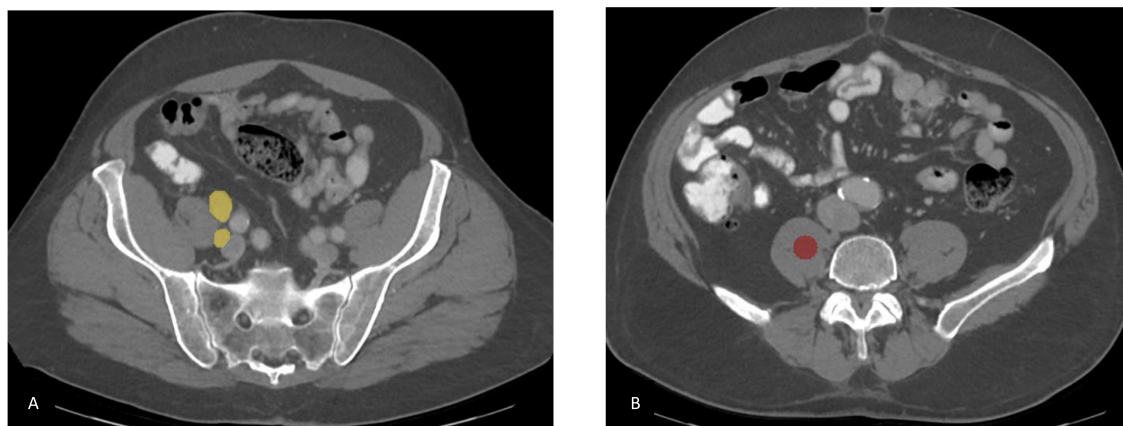

Supplemental Figure S4. A 68-year old Caucasian male with metastatic squamous carcinoma of the skin, responding to pembrolizumab. (a) Right external iliac lymph nodes selected as target lesions. (b) A volume of interest with red color label on the right paraspinal muscle was taken for normalization
